# Supplementary material
Source: publisher figshare collection journal article supplement (https://sage.figshare.com/ndownloader/files/12453491)

## Supplementary File 4

### Distribution of lighting and LISA cluster map for the region of London using VIIRS at pixel level (2014)

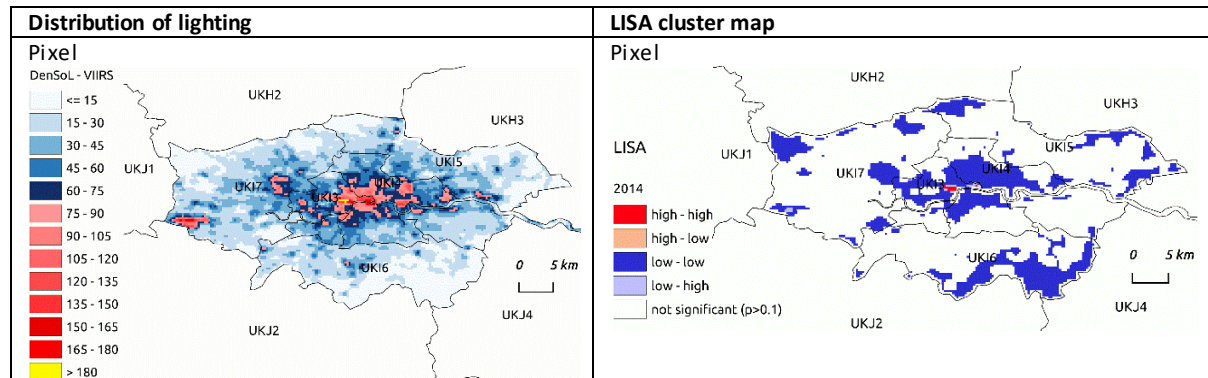

Supplement: Supplementary file 1 [file 12453491]
